# Supplementary figures and images for: Total substitution of dietary fish oil by vegetable oils stimulates muscle hypertrophic growth in Senegalese sole and the upregulation of fgf6
Source: Royal Society of Chemistry journal article supplement (doi:10.1039/c7fo00340d), 2017-01-01

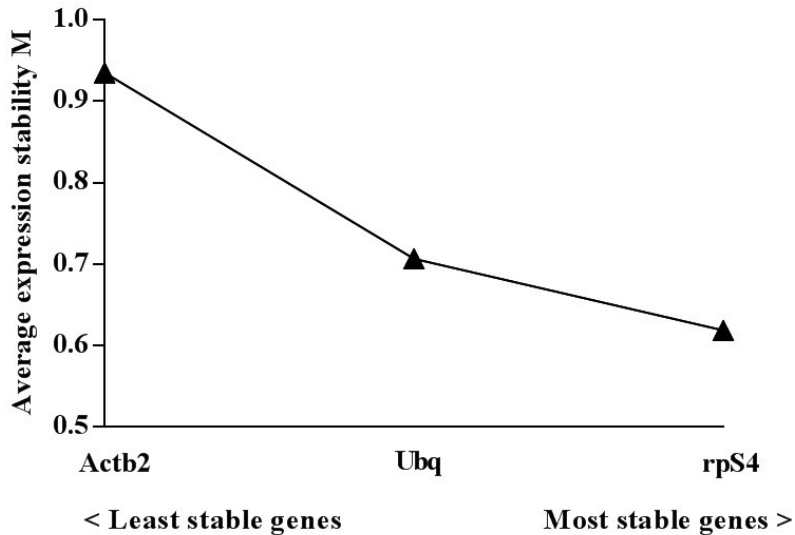

Supplement: c7fo00340d1.pdf [file c7fo00340d1.pdf]
